# Supplementary material
Source: publisher site journal article supplement (https://www.dovepress.com/article/387375)
Supplement: Supplementary file 1 [file get_supplementary_file.php]

## Supplemental figure 1 Extrapolated IDFS and OS curves

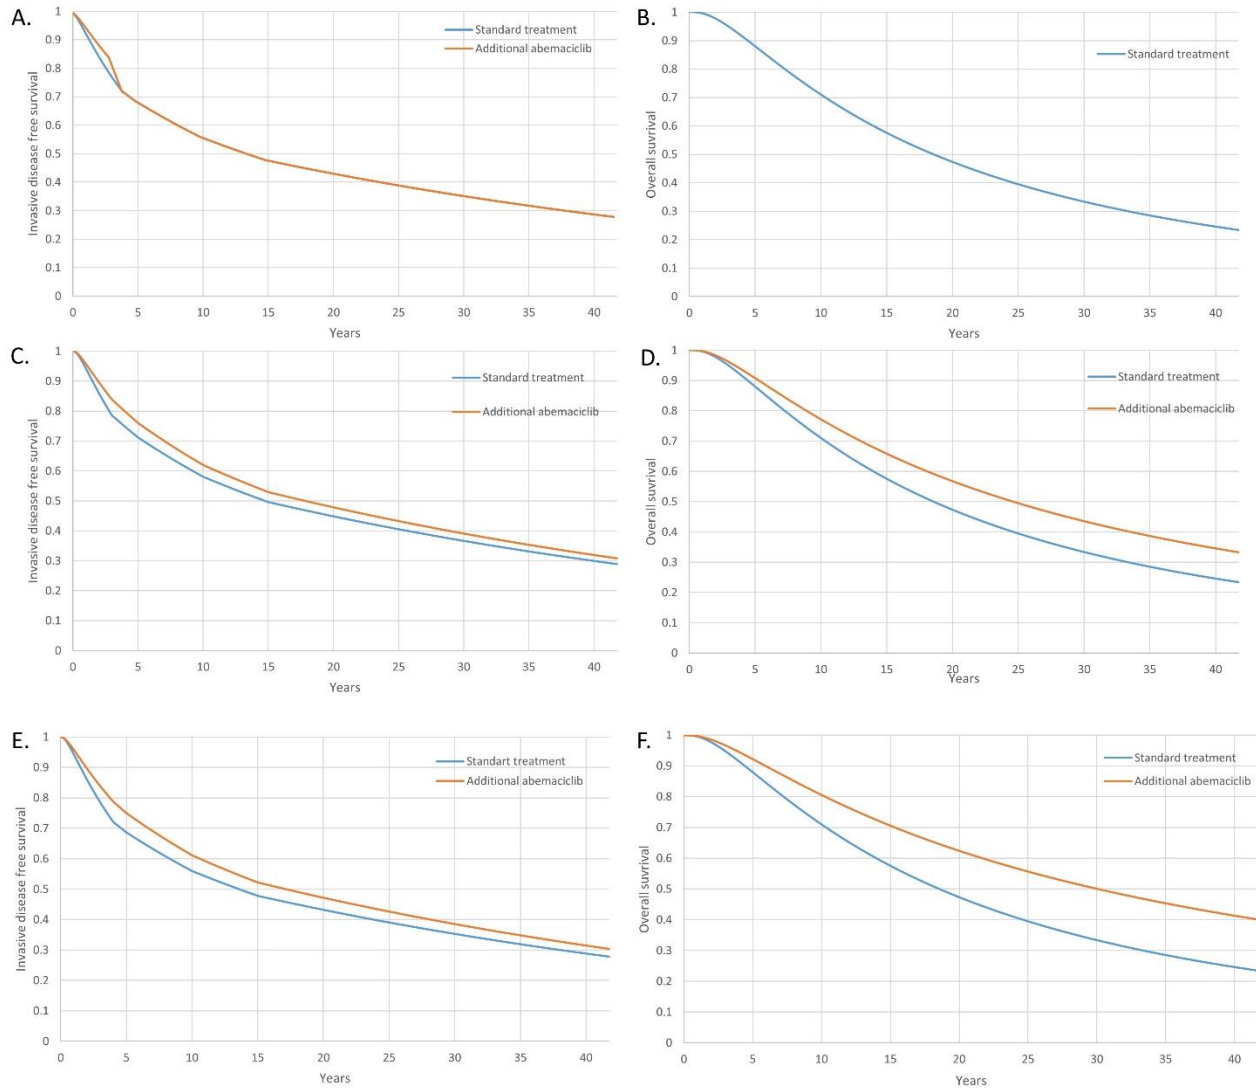

A. Extrapolated IDFS curve of additional abemaciclib and standard treatment for the unfavorable treatment effect. B. Extrapolated OS curve of additional abemaciclib and standard treatment for the unfavorable treatment effect. C. Extrapolated IDFS curve of additional abemaciclib and standard treatment for the intermediate treatment effect. D. Extrapolated OS curve of additional abemaciclib and standard treatment for the intermediate treatment effect. E. Extrapolated IDFS curve of additional abemaciclib and standard treatment for the favorable treatment effect. F. Extrapolated OS curve of additional abemaciclib and standard treatment for the favorable treatment effect.

**Abbreviations:** IDFS, invasive disease free survival; OS, overall survival

**Supplemental table 1** Costs, effectiveness and incremental cost-effectiveness for the MRD-based strategy, intermediate effect scenario, with incorporated the risk that MRD was not detected before the presence of recurrent disease

|                                              | Standard treatment | MRD-based, intermediate effect scenario, risk MRD not detected |
|----------------------------------------------|--------------------|----------------------------------------------------------------|
| <b>Costs</b>                                 |                    |                                                                |
| <i>Recurrence Free</i>                       |                    |                                                                |
| Drug acquisition costs                       | €1,706             | €21,554                                                        |
| Healthcare resource use costs                | €1,200             | €1,919                                                         |
| Genetic testing & MRD detection              |                    | €1,785                                                         |
| Adverse event medical costs                  | €30                | €335                                                           |
| Societal costs                               | €6,936             | €8,312                                                         |
| <b>Total recurrence free</b>                 | <b>€9,872</b>      | <b>€33,905</b>                                                 |
| <i>Recurrent disease</i>                     |                    |                                                                |
| Medical costs                                | €185,820           | €143,456                                                       |
| Societal costs                               | €3,237             | €2,822                                                         |
| <b>Total recurrent disease</b>               | <b>€189,057</b>    | <b>€146,278</b>                                                |
| <b>Total intervention costs</b>              | <b>€198,929</b>    | <b>€180,184</b>                                                |
| <b>Effectiveness</b>                         |                    |                                                                |
| LY recurrence free                           | 12.55              | 15.21                                                          |
| LY recurrent disease                         | 6.62               | 5.45                                                           |
| <b>Total life years</b>                      | <b>19.16</b>       | <b>20.66</b>                                                   |
| QALY recurrence free                         | 10.92              | 13.23                                                          |
| QALY recurrent disease                       | 4.90               | 4.03                                                           |
| <b>Total QALY</b>                            | <b>15.81</b>       | <b>17.26</b>                                                   |
| <b>Incremental cost-effectiveness</b>        |                    |                                                                |
| Incremental costs (€)                        |                    | -€18,745                                                       |
| Incremental effects (LY)                     |                    | 1.50                                                           |
| Incremental effects (QALYs)                  |                    | 1.45                                                           |
| Incremental cost per life-year gained (€/LY) | NA                 | dominates                                                      |
| Incremental cost per QALY gained (€/QALY)    | NA                 | dominates                                                      |

**Abbreviations:** MRD, minimal residual disease; LY, life years; QALY, Quality adjusted life years ; NA, not applicable
